# Supplementary material for: Comparing machine learning screening approaches using clinical data and cytokine profiles for COVID-19 in resource-limited and resource-abundant settings
Source: Springer Nature journal article supplement (doi:10.1038/s41598-024-63707-3), 2024-06-28
Supplement: 41598_2024_63707_MOESM1_ESM.pdf [file 41598_2024_63707_MOESM1_ESM.pdf]

## SUPPLEMENTAL MATERIALS

### Supplemental Figure 1: ROC AUC/Precision Recalls Curves for Approaches 1 and 2

ROC AUC curves for the top models from Model Approach 1 (Clinical and Common Lab Data) and Approach 2 (Cytokine and Chemokine Profile) are shown below.

#### Approach 1: Clinical Lab Data

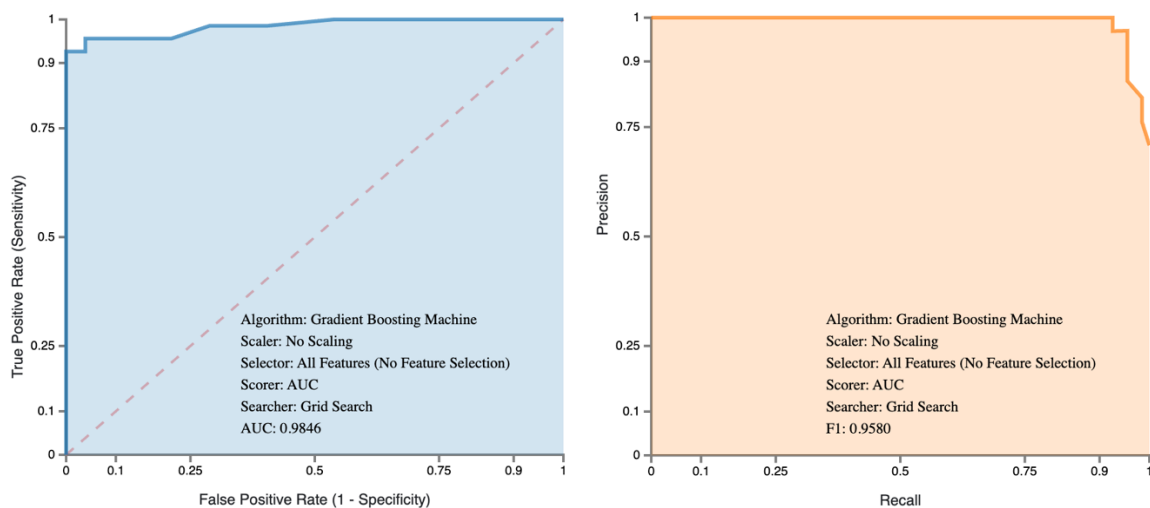

#### Approach 2: Cytokine Data

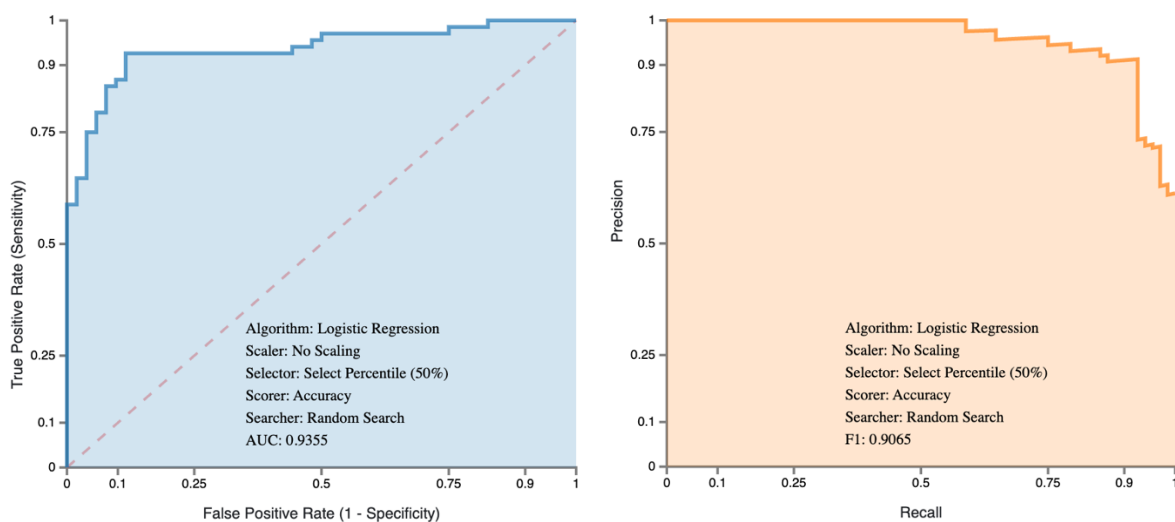

### Supplemental Table 1: Additional Models for Approaches 1-3

**Top Models Generated by MILO. (Sen. = sensitivity, Spec. = specificity)**

**Approach 1**

| Algorithm                 | Feature Selector               | Scaler         | Searcher          | Scorer   | Sen.  | Spec. | ROC/AUC | Accuracy | Training ROC/AUC | PPV   | NPV   |
|---------------------------|--------------------------------|----------------|-------------------|----------|-------|-------|---------|----------|------------------|-------|-------|
| gradient boosting machine | all features                   | no scaling     | grid search       | AUC      | 0.927 | 1.000 | 0.985   | 0.958    | 1.000            | 1.000 | 0.912 |
| gradient boosting machine | all features                   | no scaling     | random search     | accuracy | 0.927 | 1.000 | 0.988   | 0.958    | 1.000            | 1.000 | 0.912 |
| gradient boosting machine | all features                   | no scaling     | random search     | AUC      | 0.927 | 1.000 | 0.988   | 0.958    | 1.000            | 1.000 | 0.912 |
| gradient boosting machine | all features                   | no scaling     | random search     | F1       | 0.927 | 1.000 | 0.988   | 0.958    | 1.000            | 1.000 | 0.912 |
| gradient boosting machine | random forest importance (25%) | no scaling     | grid search       | accuracy | 0.927 | 1.000 | 0.985   | 0.958    | 1.000            | 1.000 | 0.912 |
| gradient boosting machine | random forest importance (50%) | no scaling     | grid search       | accuracy | 0.927 | 1.000 | 0.985   | 0.958    | 1.000            | 1.000 | 0.912 |
| gradient boosting machine | random forest importance (50%) | no scaling     | grid search       | F1       | 0.927 | 1.000 | 0.985   | 0.958    | 1.000            | 1.000 | 0.912 |
| gradient boosting machine | random forest importance (75%) | no scaling     | 2nd random search | AUC      | 0.941 | 0.981 | 0.985   | 0.958    | 1.000            | 0.985 | 0.927 |
| gradient boosting machine | all features                   | min max scaler | grid search       | accuracy | 0.927 | 1.000 | 0.985   | 0.958    | 1.000            | 1.000 | 0.912 |
| gradient boosting machine | all features                   | min max scaler | 2nd random search | accuracy | 0.941 | 0.981 | 0.986   | 0.958    | 1.000            | 0.985 | 0.927 |
| gradient boosting machine | all features                   | min max scaler | 2nd random search | accuracy | 0.941 | 0.981 | 0.986   | 0.958    | 1.000            | 0.985 | 0.927 |
| gradient boosting machine | all features                   | min max scaler | 2nd random search | F1       | 0.941 | 0.981 | 0.986   | 0.958    | 1.000            | 0.985 | 0.927 |
| gradient boosting machine | all features                   | min max scaler | 2nd random search | F1       | 0.941 | 0.981 | 0.986   | 0.958    | 1.000            | 0.985 | 0.927 |
| gradient boosting machine | random forest importance (50%) | min max scaler | grid search       | accuracy | 0.927 | 1.000 | 0.985   | 0.958    | 1.000            | 1.000 | 0.912 |
| gradient boosting machine | random forest importance (50%) | min max scaler | grid search       | F1       | 0.927 | 1.000 | 0.985   | 0.958    | 1.000            | 1.000 | 0.912 |

|                           |                                |                 |             |          |       |       |       |       |       |       |       |
|---------------------------|--------------------------------|-----------------|-------------|----------|-------|-------|-------|-------|-------|-------|-------|
| gradient boosting machine | random forest importance (75%) | min max scaler  | grid search | F1       | 0.927 | 1.000 | 0.985 | 0.958 | 1.000 | 1.000 | 0.912 |
| gradient boosting machine | all features                   | standard scaler | grid search | accuracy | 0.927 | 1.000 | 0.985 | 0.958 | 1.000 | 1.000 | 0.912 |
| gradient boosting machine | random forest importance (25%) | standard scaler | grid search | accuracy | 0.927 | 1.000 | 0.985 | 0.958 | 1.000 | 1.000 | 0.912 |
| gradient boosting machine | random forest importance (25%) | standard scaler | grid search | F1       | 0.927 | 1.000 | 0.985 | 0.958 | 1.000 | 1.000 | 0.912 |
| gradient boosting machine | random forest importance (50%) | standard scaler | grid search | accuracy | 0.927 | 1.000 | 0.985 | 0.958 | 1.000 | 1.000 | 0.912 |
| gradient boosting machine | random forest importance (50%) | standard scaler | grid search | AUC      | 0.941 | 0.981 | 0.986 | 0.958 | 1.000 | 0.985 | 0.927 |

## Approach 2

| Algorithm           | Feature Selector               | Scaler          | Searcher          | Scorer   | Sen.  | Spec. | ROC AUC | Accuracy | Training ROC/AUC | PPV   | NPV   |
|---------------------|--------------------------------|-----------------|-------------------|----------|-------|-------|---------|----------|------------------|-------|-------|
| logistic regression | select percentile (50%)        | no scaling      | 2nd random search | F1       | 0.927 | 0.885 | 0.936   | 0.908    | 0.996            | 0.913 | 0.902 |
| logistic regression | select percentile (50%)        | no scaling      | random search     | accuracy | 0.927 | 0.885 | 0.936   | 0.908    | 0.996            | 0.913 | 0.902 |
| logistic regression | select percentile (50%)        | no scaling      | random search     | F1       | 0.927 | 0.885 | 0.936   | 0.908    | 0.996            | 0.913 | 0.902 |
| logistic regression | random forest importance (50%) | standard scaler | random search     | AUC      | 0.912 | 0.885 | 0.963   | 0.900    | 0.969            | 0.912 | 0.885 |
| logistic regression | select percentile (50%)        | no scaling      | 2nd random search | AUC      | 0.927 | 0.865 | 0.934   | 0.900    | 0.996            | 0.900 | 0.900 |
| logistic regression | select percentile (50%)        | no scaling      | 2nd random search | accuracy | 0.927 | 0.865 | 0.931   | 0.900    | 0.996            | 0.900 | 0.900 |
| logistic regression | all features                   | no scaling      | random search     | accuracy | 0.941 | 0.827 | 0.948   | 0.892    | 0.996            | 0.877 | 0.915 |
| logistic regression | random forest importance (75%) | standard scaler | grid search       | accuracy | 0.897 | 0.885 | 0.947   | 0.892    | 1.000            | 0.910 | 0.868 |
| logistic regression | random forest importance (75%) | standard scaler | grid search       | accuracy | 0.897 | 0.885 | 0.947   | 0.892    | 1.000            | 0.910 | 0.868 |
| logistic regression | select percentile (75%)        | no scaling      | random search     | F1       | 0.927 | 0.846 | 0.943   | 0.892    | 0.996            | 0.887 | 0.898 |

|                     |                                |            |                   |          |       |       |       |       |       |       |       |
|---------------------|--------------------------------|------------|-------------------|----------|-------|-------|-------|-------|-------|-------|-------|
| logistic regression | all features                   | no scaling | random search     | AUC      | 0.941 | 0.827 | 0.940 | 0.892 | 0.907 | 0.877 | 0.915 |
| logistic regression | random forest importance (75%) | no scaling | 2nd random search | accuracy | 0.927 | 0.846 | 0.939 | 0.892 | 0.996 | 0.887 | 0.898 |
| logistic regression | random forest importance (75%) | no scaling | 2nd random search | AUC      | 0.927 | 0.846 | 0.939 | 0.892 | 0.996 | 0.887 | 0.898 |
| logistic regression | select percentile (75%)        | no scaling | 2nd random search | accuracy | 0.927 | 0.846 | 0.938 | 0.892 | 0.996 | 0.887 | 0.898 |
| logistic regression | select percentile (75%)        | no scaling | 2nd random search | F1       | 0.927 | 0.846 | 0.938 | 0.892 | 0.996 | 0.887 | 0.898 |
| logistic regression | random forest importance (75%) | no scaling | 2nd random search | AUC      | 0.927 | 0.846 | 0.936 | 0.892 | 0.991 | 0.887 | 0.898 |
| logistic regression | select percentile (50%)        | no scaling | 2nd random search | AUC      | 0.912 | 0.865 | 0.934 | 0.892 | 0.996 | 0.899 | 0.882 |
| logistic regression | select percentile (50%)        | no scaling | grid search       | accuracy | 0.912 | 0.865 | 0.933 | 0.892 | 0.996 | 0.899 | 0.882 |
| logistic regression | select percentile (50%)        | no scaling | grid search       | F1       | 0.912 | 0.865 | 0.933 | 0.892 | 0.996 | 0.899 | 0.882 |
| logistic regression | select percentile (50%)        | no scaling | grid search       | AUC      | 0.912 | 0.865 | 0.930 | 0.892 | 0.996 | 0.899 | 0.882 |
| logistic regression | select percentile (50%)        | no scaling | random search     | AUC      | 0.927 | 0.846 | 0.930 | 0.892 | 0.987 | 0.887 | 0.898 |

### Approach 3

| Algorithm                 | Feature Selector               | Scaler     | Searcher    | Scorer   | Sen.  | Spec. | ROC AUC | Accuracy | Training ROC/AUC | PPV   | NPV   |
|---------------------------|--------------------------------|------------|-------------|----------|-------|-------|---------|----------|------------------|-------|-------|
| gradient boosting machine | random forest importance (25%) | no scaling | grid search | AUC      | 0.956 | 0.981 | 0.970   | 0.967    | 1.000            | 0.985 | 0.944 |
| gradient boosting machine | random forest importance (25%) | no scaling | grid search | AUC      | 0.956 | 0.981 | 0.970   | 0.967    | 1.000            | 0.985 | 0.944 |
| gradient boosting machine | all features                   | no scaling | grid search | accuracy | 0.927 | 1.000 | 0.985   | 0.958    | 1.000            | 1.000 | 0.912 |
| gradient boosting machine | all features                   | no scaling | grid search | F1       | 0.927 | 1.000 | 0.985   | 0.958    | 1.000            | 1.000 | 0.912 |
| gradient boosting machine | random forest importance (25%) | no scaling | grid search | accuracy | 0.927 | 1.000 | 0.967   | 0.958    | 1.000            | 1.000 | 0.912 |
| gradient boosting machine | random forest                  | no scaling | grid search | accuracy | 0.927 | 1.000 | 0.968   | 0.958    | 1.000            | 1.000 | 0.912 |

|                           |                                |            |                   |          |       |       |       |       |       |       |       |
|---------------------------|--------------------------------|------------|-------------------|----------|-------|-------|-------|-------|-------|-------|-------|
| gradient boosting machine | importance (25%) random forest | no scaling | grid search       | F1       | 0.927 | 1.000 | 0.967 | 0.958 | 1.000 | 1.000 | 0.912 |
| gradient boosting machine | importance (25%) random forest | no scaling | grid search       | F1       | 0.927 | 1.000 | 0.968 | 0.958 | 1.000 | 1.000 | 0.912 |
| gradient boosting machine | importance (25%) random forest | no scaling | random search     | accuracy | 0.941 | 0.981 | 0.972 | 0.958 | 1.000 | 0.985 | 0.927 |
| gradient boosting machine | importance (25%) random forest | no scaling | random search     | F1       | 0.941 | 0.981 | 0.972 | 0.958 | 1.000 | 0.985 | 0.927 |
| gradient boosting machine | importance (50%) random forest | no scaling | grid search       | accuracy | 0.927 | 1.000 | 0.985 | 0.958 | 1.000 | 1.000 | 0.912 |
| gradient boosting machine | importance (50%) random forest | no scaling | grid search       | accuracy | 0.927 | 1.000 | 0.984 | 0.958 | 1.000 | 1.000 | 0.912 |
| gradient boosting machine | importance (50%) random forest | no scaling | grid search       | AUC      | 0.941 | 0.981 | 0.984 | 0.958 | 1.000 | 0.985 | 0.927 |
| gradient boosting machine | importance (50%) random forest | no scaling | grid search       | F1       | 0.927 | 1.000 | 0.985 | 0.958 | 1.000 | 1.000 | 0.912 |
| gradient boosting machine | importance (50%) random forest | no scaling | 2nd random search | accuracy | 0.941 | 0.981 | 0.988 | 0.958 | 1.000 | 0.985 | 0.927 |
| gradient boosting machine | importance (50%) random forest | no scaling | 2nd random search | F1       | 0.941 | 0.981 | 0.988 | 0.958 | 1.000 | 0.985 | 0.927 |
| gradient boosting machine | importance (75%) random forest | no scaling | grid search       | accuracy | 0.927 | 1.000 | 0.985 | 0.958 | 1.000 | 1.000 | 0.912 |
| gradient boosting machine | importance (75%) random forest | no scaling | grid search       | F1       | 0.927 | 1.000 | 0.985 | 0.958 | 1.000 | 1.000 | 0.912 |
| gradient boosting machine | importance (75%) random forest | no scaling | random search     | accuracy | 0.941 | 0.981 | 0.988 | 0.958 | 1.000 | 0.985 | 0.927 |
| gradient boosting machine | importance (75%) random forest | no scaling | random search     | F1       | 0.941 | 0.981 | 0.988 | 0.958 | 1.000 | 0.985 | 0.927 |
| gradient boosting machine | importance (75%) random forest | no scaling | 2nd random search | accuracy | 0.941 | 0.981 | 0.986 | 0.958 | 1.000 | 0.985 | 0.927 |

**Supplemental Table 2: Descriptive Statistics for Dataset A (Training and Initial Validation,  
n=150)**

|                                 | count | mean   | std    | min | 25%   | 50%  | 75% | max |
|---------------------------------|-------|--------|--------|-----|-------|------|-----|-----|
| Age (in Years)                  | 150   | 45.093 | 16.897 | 17  | 31.25 | 44.5 | 58  | 81  |
| Pregnant                        | 150   | 0.013  | 0.115  | 0   | 0     | 0    | 0   | 1   |
| Heart Rate                      | 150   | 88.747 | 20.528 | 18  | 76    | 86   | 98  | 152 |
| Respiratory Rate                | 150   | 20.66  | 7.827  | 11  | 16    | 18   | 24  | 80  |
| Systolic blood pressure (mmHg)  | 150   | 129.36 | 22.623 | 60  | 120   | 130  | 140 | 202 |
| Diastolic blood pressure (mmHg) | 150   | 80.513 | 14.704 | 30  | 70    | 80   | 90  | 130 |
| Temperature (Fahrenheit)        | 150   | 98.185 | 11.481 | 1   | 98    | 99   | 101 | 104 |
| Weight (Kg)                     | 150   | 74.18  | 15.694 | 40  | 61.25 | 75   | 85  | 110 |
| HIV Status                      | 150   | 0.013  | 0.115  | 0   | 0     | 0    | 0   | 1   |
| Hypertension                    | 150   | 0.473  | 0.501  | 0   | 0     | 0    | 1   | 1   |
| Hospitalization within 90 Days  | 150   | 0.04   | 0.197  | 0   | 0     | 0    | 0   | 1   |
| Weight Loss                     | 150   | 0.133  | 0.341  | 0   | 0     | 0    | 0   | 1   |
| Chronic Lung Disease            | 150   | 0.1    | 0.301  | 0   | 0     | 0    | 0   | 1   |
| Diabetes                        | 150   | 0.327  | 0.471  | 0   | 0     | 0    | 1   | 1   |
| Cardiovascular Disease          | 150   | 0.14   | 0.348  | 0   | 0     | 0    | 0   | 1   |
| Chronic Liver                   | 150   | 0.047  | 0.212  | 0   | 0     | 0    | 0   | 1   |
| Chronic Renal Disease           | 150   | 0.053  | 0.225  | 0   | 0     | 0    | 0   | 1   |
| Neurologic Disability           | 150   | 0.02   | 0.14   | 0   | 0     | 0    | 0   | 1   |
| On ACE or ARB meds              | 150   | 0.127  | 0.334  | 0   | 0     | 0    | 0   | 1   |
| On NSAIDs                       | 150   | 0.087  | 0.282  | 0   | 0     | 0    | 0   | 1   |
| Cancer (Family History)         | 150   | 0.1    | 0.301  | 0   | 0     | 0    | 0   | 1   |
| Diabetes (Family History)       | 150   | 0.467  | 0.501  | 0   | 0     | 0    | 1   | 1   |
| Heart Disease (Family History)  | 150   | 0.313  | 0.465  | 0   | 0     | 0    | 1   | 1   |
| Smoker (Current)                | 150   | 0.133  | 0.341  | 0   | 0     | 0    | 0   | 1   |
| Smoker (Past)                   | 150   | 0.28   | 0.451  | 0   | 0     | 0    | 1   | 1   |
| Never Smoked                    | 150   | 0.693  | 0.463  | 0   | 0     | 1    | 1   | 1   |

|                                                   |     |         |        |      |        |       |        |      |
|---------------------------------------------------|-----|---------|--------|------|--------|-------|--------|------|
| Acute Respiratory Distress Syndrome               | 150 | 0.293   | 0.457  | 0    | 0      | 0     | 1      | 1    |
| Shortness of breath                               | 150 | 0.66    | 0.475  | 0    | 0      | 1     | 1      | 1    |
| Cough                                             | 150 | 0.727   | 0.447  | 0    | 0      | 1     | 1      | 1    |
| Sore Throat                                       | 150 | 0.56    | 0.498  | 0    | 0      | 1     | 1      | 1    |
| Sputum Production                                 | 150 | 0.473   | 0.501  | 0    | 0      | 0     | 1      | 1    |
| Nasal Congestion                                  | 150 | 0.293   | 0.457  | 0    | 0      | 0     | 1      | 1    |
| Fatigue                                           | 150 | 0.773   | 0.42   | 0    | 1      | 1     | 1      | 1    |
| Chest Pain                                        | 150 | 0.18    | 0.385  | 0    | 0      | 0     | 0      | 1    |
| Diarrhea Loose Stool                              | 150 | 0.153   | 0.362  | 0    | 0      | 0     | 0      | 1    |
| Vomiting                                          | 150 | 0.087   | 0.282  | 0    | 0      | 0     | 0      | 1    |
| Abdominal Pain                                    | 150 | 0.14    | 0.348  | 0    | 0      | 0     | 0      | 1    |
| Headache                                          | 150 | 0.54    | 0.5    | 0    | 0      | 1     | 1      | 1    |
| Chills                                            | 150 | 0.16    | 0.368  | 0    | 0      | 0     | 0      | 1    |
| Confusion                                         | 150 | 0.067   | 0.25   | 0    | 0      | 0     | 0      | 1    |
| Need O2 Nasal Cannula                             | 150 | 0.393   | 0.49   | 0    | 0      | 0     | 1      | 1    |
| O2 Saturation (Room Air): All Patients            | 150 | 88.767  | 13.435 | 42   | 84     | 96    | 98     | 99   |
| Active TB                                         | 150 | 0.013   | 0.115  | 0    | 0      | 0     | 0      | 1    |
| Alanine Transaminase Test (ALT)                   | 150 | 47.553  | 42.274 | 9    | 20     | 37.5  | 58     | 304  |
| Chest Radiograph                                  | 150 | 0.46    | 0.5    | 0    | 0      | 0     | 1      | 1    |
| Lymphocyte Count%                                 | 150 | 25.429  | 13.968 | 0.7  | 13.325 | 28    | 37     | 56   |
| Creatinine(mg/dl)                                 | 150 | 1.008   | 1.532  | 0.1  | 0.7    | 0.8   | 0.995  | 19   |
| Haemoglobin(g/dl)                                 | 150 | 13.566  | 1.969  | 7.7  | 12.2   | 13.55 | 15.1   | 18.4 |
| Platelet Blood Count(/UL)                         | 150 | 237.195 | 97.156 | 2.2  | 176    | 225   | 280.75 | 610  |
| White Blood Cells (WBC) Count(/UL)                | 150 | 10.457  | 7.491  | 1.6  | 6.6    | 8.6   | 11.475 | 71   |
| Sodium (Na)(mmol/L)                               | 150 | 136.662 | 11.6   | 14   | 135    | 137   | 140    | 164  |
| Potassium (K)(mmol/L)                             | 150 | 4.436   | 0.673  | 2.46 | 4.002  | 4.5   | 4.8    | 7    |
| Wheezing                                          | 150 | 0.373   | 0.485  | 0    | 0      | 0     | 1      | 1    |
| *HGNC alternative names provided at base of table |     |         |        |      |        |       |        |      |

|             |     |          |          |     |         |        |         |        |
|-------------|-----|----------|----------|-----|---------|--------|---------|--------|
| IL-2R alpha | 150 | 118.96   | 71.234   | 29  | 71.25   | 97.5   | 151     | 492    |
| MIG         | 150 | 753.82   | 1939.696 | 51  | 145     | 234    | 585.5   | 20485  |
| MIP-1b      | 150 | 303.353  | 160.993  | 116 | 269     | 291    | 321.5   | 2129   |
| IL-6        | 150 | 52.28    | 261.184  | 0   | 1       | 3      | 16.5    | 3041   |
| IFN-a2      | 150 | 7.44     | 6.59     | 1   | 3       | 6      | 9       | 53     |
| IFN-g       | 150 | 19.767   | 30.691   | 1   | 3.25    | 11     | 21.75   | 259    |
| SDF-1a      | 150 | 1359.393 | 459.692  | 501 | 1035.5  | 1295.5 | 1622    | 3006   |
| IL-1ra      | 150 | 1462.287 | 2243.436 | 52  | 312.25  | 699.5  | 1478.5  | 14528  |
| MCP-3       | 150 | 9.167    | 16.089   | 0   | 1       | 3      | 8.75    | 99     |
| IL-16       | 150 | 452.24   | 821.535  | 25  | 75.25   | 182.5  | 480.25  | 5450   |
| IL-12 (p40) | 150 | 111.607  | 124.03   | 15  | 45.25   | 82     | 127.75  | 1085   |
| LIF         | 150 | 80.867   | 60.049   | 23  | 49.25   | 71     | 92.75   | 619    |
| TNF-b       | 150 | 1857.547 | 364.288  | 554 | 1665.75 | 1857.5 | 2101.75 | 2650   |
| IL-5        | 150 | 18.153   | 62.458   | 1   | 7       | 7      | 7       | 679    |
| GM-CSF      | 150 | 6.607    | 5.525    | 0   | 3       | 5      | 8       | 43     |
| MIF         | 150 | 4395.293 | 7145.692 | 184 | 812     | 2570   | 5102    | 52384  |
| TNF-a       | 150 | 69.927   | 77.17    | 33  | 48.25   | 56     | 72      | 903    |
| RANTES      | 150 | 22030.51 | 31352.41 | 876 | 8038.25 | 15709  | 23939.5 | 305593 |
| IL-2        | 150 | 2.707    | 5.373    | 0   | 1       | 1      | 1       | 42     |
| IL-1 beta   | 150 | 34.927   | 323.931  | 1   | 4       | 6      | 10      | 3974   |
| IL-18       | 150 | 581.513  | 821.346  | 10  | 120     | 270.5  | 761.75  | 6974   |
| Eotaxin     | 150 | 81.947   | 56.423   | 13  | 49      | 71     | 93.5    | 397    |
| Basic FGF   | 150 | 25.967   | 20.37    | 3   | 15      | 23     | 31.75   | 187    |
| VGEF        | 150 | 26.407   | 87.718   | 1   | 6       | 6      | 6       | 608    |
| b-NGF       | 150 | 7.447    | 14.761   | 0   | 0       | 2      | 8       | 104    |
| PDGF-BB     | 150 | 2013.167 | 1357.142 | 231 | 1120.75 | 1771   | 2392.25 | 9018   |
| IP-10       | 150 | 2397.193 | 4951.196 | 13  | 261.5   | 512    | 1961.75 | 32947  |
| IL-13       | 150 | 5.453    | 3.778    | 1   | 3       | 5      | 7       | 32     |
| IL-4        | 150 | 5.593    | 2.761    | 3   | 4       | 5      | 6       | 22     |
| MCP-1       | 150 | 55.053   | 112.235  | 2   | 11.25   | 20     | 50      | 845    |
| IL8         | 150 | 164.247  | 567.883  | 1   | 10      | 22     | 57.25   | 4520   |
| MIP-1a      | 150 | 14.527   | 131.278  | 0   | 1       | 2      | 3       | 1598   |
| IL-10       | 150 | 10.28    | 13.706   | 0   | 4       | 7      | 12      | 127    |
| G-CSF       | 150 | 284.767  | 1107.381 | 37  | 88.75   | 118    | 205     | 12791  |
| GRO-a       | 150 | 1098.84  | 431.233  | 12  | 871.5   | 1146   | 1423    | 2239   |
| HGF         | 150 | 2027.647 | 6575.35  | 186 | 419.75  | 574.5  | 1191.75 | 71624  |
| IL-1 alpha  | 150 | 17.133   | 20.988   | 2   | 5       | 12     | 21.75   | 197    |
| IL-3        | 150 | 0.233    | 0.923    | 0   | 0       | 0      | 0       | 8      |
| SCF         | 150 | 93.787   | 50.983   | 35  | 61      | 78     | 108.5   | 328    |
| TRAIL       | 150 | 48.24    | 57.219   | 1   | 27.25   | 39     | 48      | 621    |



|                       |     |          |          |       |          |         |          |        |
|-----------------------|-----|----------|----------|-------|----------|---------|----------|--------|
| M-CSF                 | 150 | 58.487   | 45.192   | 7     | 26.25    | 44      | 73.75    | 278    |
| CTACK                 | 150 | 592.38   | 332.846  | 83    | 368.5    | 527     | 790.5    | 1884   |
| IL-15                 | 150 | 27.42    | 35.872   | 19    | 19       | 19      | 19       | 264    |
| IL-7                  | 150 | 10.38    | 19.491   | 2     | 3        | 3       | 3        | 140    |
| IL-12 (p70)           | 150 | 4.253    | 5.205    | 0     | 2        | 2       | 4        | 35     |
| IL-17                 | 150 | 10.813   | 13.085   | 1     | 5        | 8       | 13       | 109    |
| IL-9                  | 150 | 688.527  | 154.145  | 241   | 641.25   | 710     | 772.75   | 1002   |
| SCGF-b                | 150 | 90721.29 | 44385.86 | 14502 | 60229.25 | 79131.5 | 111085.8 | 251693 |
| Covid-Status-Combined | 150 | 0.5      | 0.502    | 0     | 0        | 0.5     | 1        | 1      |

\* FGF basic (FGF2), Eotaxin (CCL11), G-CSF (CSF3), GM-CSF (CSF2), IFN- $\gamma$  (IFNG), IL-1 $\beta$  (IL1B), IL-1ra (IL1RN), IL-1 $\alpha$  (IL1A), IL-2R $\alpha$  (IL2RA), IL3, IL-12 (p40) (IL12B), IL16, IL2, IL4, IL5, IL6, IL7, IL8 (CXCL8), IL9, GRO- $\alpha$  (CXCL1), HGF, IFN- $\alpha$ 2 (IFNA2), LIF, MCP-3 (CCL7), IL10, IL-12 (p70) (IL12A), IL13, IL15, IL17A, IP-10 (CXCL10), MCP-1 (MCAF) (CCL2), MIG (CXCL9),  $\beta$ -NGF (NGF), SCF (KITLG), SCGF- $\beta$  (CLEC11A), SDF-1 $\alpha$  (CXCL12), MIP-1 $\alpha$  (CCL3), MIP-1 $\beta$  (CCL4), PDGF-BB (PDGFB), RANTES (CCL5), TNF- $\alpha$ , VEGF (VEGFA), CTACK (CCL27), MIF, TRAIL (TNFSF10), IL-18 (IL18), M-CSF (CSF1), TNF- $\beta$  (LTA).

**Supplemental Table 3: Descriptive Statistics for Dataset B (Generalization Testing, n=120)**

|                                 | count | mean    | std    | min | 25%  | 50%  | 75%   | max |
|---------------------------------|-------|---------|--------|-----|------|------|-------|-----|
| Age (in Years)                  | 120   | 48.525  | 19.112 | 17  | 30   | 47.5 | 65    | 86  |
| Pregnant                        | 120   | 0.008   | 0.091  | 0   | 0    | 0    | 0     | 1   |
| Heart Rate                      | 120   | 87.725  | 18.536 | 34  | 76.5 | 86   | 101   | 130 |
| Respiratory Rate                | 120   | 21.033  | 7.756  | 11  | 16   | 19   | 23.25 | 58  |
| Systolic blood pressure (mmHg)  | 120   | 125.875 | 21.874 | 51  | 110  | 130  | 140   | 212 |
| Diastolic blood pressure (mmHg) | 120   | 78.533  | 14.601 | 20  | 70   | 80   | 90    | 110 |
| Temperature (Fahrenheit)        | 120   | 104.41  | 82.637 | 1   | 98   | 100  | 101   | 987 |
| Weight (Kg)                     | 120   | 73.817  | 16.376 | 40  | 62   | 71   | 84.25 | 128 |
| HIV Status                      | 120   | 0       | 0      | 0   | 0    | 0    | 0     | 0   |
| Hypertension                    | 120   | 0.492   | 0.502  | 0   | 0    | 0    | 1     | 1   |
| Hospitalization within 90 Days  | 120   | 0.05    | 0.219  | 0   | 0    | 0    | 0     | 1   |
| Weight Loss                     | 120   | 0.117   | 0.322  | 0   | 0    | 0    | 0     | 1   |
| Chronic Lung Disease            | 120   | 0.125   | 0.332  | 0   | 0    | 0    | 0     | 1   |
| Diabetes                        | 120   | 0.333   | 0.473  | 0   | 0    | 0    | 1     | 1   |
| Cardiovascular Disease          | 120   | 0.192   | 0.395  | 0   | 0    | 0    | 0     | 1   |
| Chronic Liver                   | 120   | 0.058   | 0.235  | 0   | 0    | 0    | 0     | 1   |
| Chronic Renal Disease           | 120   | 0.083   | 0.278  | 0   | 0    | 0    | 0     | 1   |

|                                        |     |        |        |       |       |       |       |       |
|----------------------------------------|-----|--------|--------|-------|-------|-------|-------|-------|
| Neurologic Disability                  | 120 | 0.025  | 0.157  | 0     | 0     | 0     | 0     | 1     |
| On ACE or ARB meds                     | 120 | 0.15   | 0.359  | 0     | 0     | 0     | 0     | 1     |
| On NSAIDs                              | 120 | 0.083  | 0.278  | 0     | 0     | 0     | 0     | 1     |
| Cancer (Family History)                | 120 | 0.117  | 0.322  | 0     | 0     | 0     | 0     | 1     |
| Diabetes (Family History)              | 120 | 0.383  | 0.488  | 0     | 0     | 0     | 1     | 1     |
| Heart Disease (Family History)         | 120 | 0.292  | 0.456  | 0     | 0     | 0     | 1     | 1     |
| Smoker (Current)                       | 120 | 0.175  | 0.382  | 0     | 0     | 0     | 0     | 1     |
| Smoker (Past)                          | 120 | 0.267  | 0.444  | 0     | 0     | 0     | 1     | 1     |
| Never Smoked                           | 120 | 0.683  | 0.467  | 0     | 0     | 1     | 1     | 1     |
| Acute Respiratory Distress Syndrome    | 120 | 0.325  | 0.47   | 0     | 0     | 0     | 1     | 1     |
| Shortness of breath                    | 120 | 0.717  | 0.453  | 0     | 0     | 1     | 1     | 1     |
| Cough                                  | 120 | 0.775  | 0.419  | 0     | 1     | 1     | 1     | 1     |
| Sore Throat                            | 120 | 0.558  | 0.499  | 0     | 0     | 1     | 1     | 1     |
| Sputum Production                      | 120 | 0.4    | 0.492  | 0     | 0     | 0     | 1     | 1     |
| Nasal Congestion                       | 120 | 0.25   | 0.435  | 0     | 0     | 0     | 0.25  | 1     |
| Fatigue                                | 120 | 0.725  | 0.448  | 0     | 0     | 1     | 1     | 1     |
| Chest Pain                             | 120 | 0.233  | 0.425  | 0     | 0     | 0     | 0     | 1     |
| Diarrhea Loose Stool                   | 120 | 0.15   | 0.359  | 0     | 0     | 0     | 0     | 1     |
| Vomiting                               | 120 | 0.1    | 0.301  | 0     | 0     | 0     | 0     | 1     |
| Abdominal Pain                         | 120 | 0.167  | 0.374  | 0     | 0     | 0     | 0     | 1     |
| Headache                               | 120 | 0.5    | 0.502  | 0     | 0     | 0.5   | 1     | 1     |
| Chills                                 | 120 | 0.208  | 0.408  | 0     | 0     | 0     | 0     | 1     |
| Confusion                              | 120 | 0.167  | 0.374  | 0     | 0     | 0     | 0     | 1     |
| Need O2 Nasal Cannula                  | 120 | 0.458  | 0.5    | 0     | 0     | 0     | 1     | 1     |
| O2 Saturation (Room Air): All Patients | 120 | 86.633 | 15.183 | 35    | 80    | 93    | 98    | 99    |
| Active TB                              | 120 | 0.008  | 0.091  | 0     | 0     | 0     | 0     | 1     |
| Alanine Transaminase Test (ALT)        | 120 | 42.636 | 45.572 | 6     | 18.75 | 29.5  | 47.25 | 258.3 |
| Chest Radiograph                       | 120 | 0.525  | 0.501  | 0     | 0     | 1     | 1     | 1     |
| Lymphocyte Count%                      | 120 | 29.519 | 80.613 | 1.069 | 9.35  | 21.05 | 33.25 | 891   |
| Creatinine(mg/dl)                      | 120 | 1.536  | 2.122  | 0.32  | 0.708 | 0.9   | 1.2   | 15.3  |

|                                                   |     |          |          |     |         |        |          |        |
|---------------------------------------------------|-----|----------|----------|-----|---------|--------|----------|--------|
| Haemoglobin(g/dl)                                 | 120 | 14.175   | 12.034   | 7.7 | 11.9    | 13.5   | 14.5     | 143    |
| Platelet Blood Count(/UL)                         | 120 | 236.273  | 90.259   | 44  | 176     | 236    | 280      | 525    |
| White Blood Cells (WBC) Count(/UL)                | 120 | 10.015   | 5.194    | 3.4 | 6.75    | 8.5    | 11.235   | 34     |
| Sodium (Na)(mmol/L)                               | 120 | 136.004  | 13.473   | 0   | 135     | 137    | 140      | 150    |
| Potassium (K)(mmol/L)                             | 120 | 4.448    | 0.81     | 0   | 4.1     | 4.4    | 4.9      | 6.2    |
| Wheezing                                          | 120 | 0.45     | 0.5      | 0   | 0       | 0      | 1        | 1      |
| *HGNC alternative names provided at base of table |     |          |          |     |         |        |          |        |
| IL-2R alpha                                       | 120 | 129.117  | 95.519   | 40  | 69.75   | 96.5   | 155.75   | 720    |
| MIG                                               | 120 | 723.408  | 1378.148 | 37  | 133.25  | 236.5  | 660.5    | 9732   |
| MIP-1b                                            | 120 | 279.867  | 81.797   | 38  | 240     | 279.5  | 314.25   | 786    |
| IL-6                                              | 120 | 115.408  | 573.019  | 0   | 1       | 3      | 14.5     | 5823   |
| IFN-a2                                            | 120 | 7.033    | 3.653    | 1   | 4       | 6      | 9        | 21     |
| IFN-g                                             | 120 | 27.392   | 46.97    | 1   | 6       | 12     | 25       | 288    |
| SDF-1a                                            | 120 | 1375.2   | 586.091  | 380 | 962.75  | 1262.5 | 1693     | 3495   |
| IL-1ra                                            | 120 | 1917.55  | 3722.235 | 92  | 394     | 793.5  | 1602.5   | 30036  |
| MCP-3                                             | 120 | 11.592   | 23.807   | 0   | 1       | 3      | 10.25    | 146    |
| IL-16                                             | 120 | 449.375  | 739.647  | 22  | 86.5    | 243.5  | 422.25   | 6323   |
| IL-12 (p40)                                       | 120 | 113.608  | 101.438  | 15  | 52.75   | 83.5   | 138      | 691    |
| LIF                                               | 120 | 78.325   | 37.403   | 22  | 54      | 72     | 96.25    | 266    |
| TNF-b                                             | 120 | 1748.25  | 434.859  | 260 | 1511.25 | 1777   | 2036.5   | 2679   |
| IL-5                                              | 120 | 10.417   | 18.288   | 1   | 7       | 7      | 7        | 143    |
| GM-CSF                                            | 120 | 5.867    | 3.557    | 1   | 4       | 5      | 7        | 22     |
| MIF                                               | 120 | 3327.05  | 4455.378 | 355 | 961.25  | 2152   | 4382.5   | 42901  |
| TNF-a                                             | 120 | 67.317   | 63.381   | 16  | 46.75   | 56     | 65       | 606    |
| RANTES                                            | 120 | 18867.17 | 20630.27 | 640 | 7767.25 | 14970  | 23180.25 | 161535 |
| IL-2                                              | 120 | 1.875    | 2.569    | 0   | 1       | 1      | 1        | 21     |
| IL-1 beta                                         | 120 | 7.342    | 5.449    | 2   | 4       | 6      | 9        | 33     |
| IL-18                                             | 120 | 725.258  | 994.128  | 18  | 121.5   | 362    | 886.75   | 6009   |
| Eotaxin                                           | 120 | 87.392   | 66.749   | 21  | 43.75   | 67.5   | 110.75   | 373    |
| Basic FGF                                         | 120 | 29       | 22.078   | 4   | 18      | 25     | 34.25    | 205    |
| VGEF                                              | 120 | 11.108   | 30.144   | 1   | 6       | 6      | 6        | 300    |
| b-NGF                                             | 120 | 6.567    | 9.712    | 0   | 0.75    | 3.5    | 7        | 54     |
| PDGF-BB                                           | 120 | 2055.858 | 1962.932 | 180 | 1051.25 | 1558   | 2783.5   | 17941  |
| IP-10                                             | 120 | 2755.992 | 5339.063 | 48  | 287     | 748    | 2793.25  | 40824  |
| IL-13                                             | 120 | 5.5      | 3.435    | 1   | 3       | 5      | 7        | 21     |

|                       |     |          |          |       |          |        |          |        |
|-----------------------|-----|----------|----------|-------|----------|--------|----------|--------|
| IL-4                  | 120 | 5.308    | 1.873    | 2     | 4        | 5      | 6        | 13     |
| MCP-1                 | 120 | 130.558  | 437.442  | 3     | 11       | 18.5   | 39.75    | 3798   |
| IL8                   | 120 | 96.092   | 359.511  | 1     | 10       | 23     | 48.75    | 3528   |
| MIP-1a                | 120 | 5.233    | 20.883   | 1     | 1        | 2      | 3        | 208    |
| IL-10                 | 120 | 16.45    | 60.818   | 1     | 4.75     | 7      | 12.25    | 605    |
| G-CSF                 | 120 | 357.158  | 1543.681 | 39    | 93.5     | 123    | 181      | 16156  |
| GRO-a                 | 120 | 990.908  | 509.878  | 24    | 649      | 1059.5 | 1307.75  | 3447   |
| HGF                   | 120 | 2071.342 | 4504.441 | 139   | 416.5    | 701    | 1301.25  | 40205  |
| IL-1 alpha            | 120 | 19.458   | 31.033   | 2     | 7        | 15     | 22       | 327    |
| IL-3                  | 120 | 0.233    | 0.683    | 0     | 0        | 0      | 0        | 4      |
| SCF                   | 120 | 97.875   | 65.474   | 20    | 60       | 82.5   | 110.5    | 459    |
| TRAIL                 | 120 | 42.1     | 32.743   | 1     | 26       | 36     | 50       | 213    |
| M-CSF                 | 120 | 67.808   | 56.613   | 7     | 30       | 50     | 89       | 310    |
| CTACK                 | 120 | 628.617  | 400.6    | 66    | 374.25   | 542    | 783      | 2893   |
| IL-15                 | 120 | 19.567   | 4.895    | 19    | 19       | 19     | 19       | 70     |
| IL-7                  | 120 | 7.267    | 13.031   | 2     | 3        | 3      | 4        | 95     |
| IL-12 (p70)           | 120 | 2.75     | 2.19     | 0     | 2        | 2      | 3        | 12     |
| IL-17                 | 120 | 10.208   | 7.023    | 1     | 6        | 9      | 13       | 41     |
| IL-9                  | 120 | 648.342  | 174.651  | 66    | 570.75   | 685.5  | 767.25   | 946    |
| SCGF-b                | 120 | 94666.96 | 50309.64 | 31720 | 61866.75 | 82741  | 110549.5 | 357503 |
| Covid-Status-Combined | 120 | 0.567    | 0.498    | 0     | 0        | 1      | 1        | 1      |

\* FGF basic (FGF2), Eotaxin (CCL11), G-CSF (CSF3), GM-CSF (CSF2), IFN- $\gamma$  (IFNG), IL-1 $\beta$  (IL1B), IL-1ra (IL1RN), IL-1 $\alpha$  (IL1A), IL-2R $\alpha$  (IL2RA), IL3, IL-12 (p40) (IL12B), IL16, IL2, IL4, IL5, IL6, IL7, IL8 (CXCL8), IL9, GRO- $\alpha$  (CXCL1), HGF, IFN- $\alpha$ 2 (IFNA2), LIF, MCP-3 (CCL7), IL10, IL-12 (p70) (IL12A), IL13, IL15, IL17A, IP-10 (CXCL10), MCP-1 (MCAF) (CCL2), MIG (CXCL9),  $\beta$ -NGF (NGF), SCF (KITLG), SCGF- $\beta$  (CLEC11A), SDF-1 $\alpha$  (CXCL12), MIP-1 $\alpha$  (CCL3), MIP-1 $\beta$  (CCL4), PDGF-BB (PDGFB), RANTES (CCL5), TNF- $\alpha$ , VEGF (VEGFA), CTACK (CCL27), MIF, TRAIL (TNFSF10), IL-18 (IL18), M-CSF (CSF1), TNF- $\beta$  (LTA).
